# Supplementary material for: RNA-Seq Analyses Generate Comprehensive Transcriptomic Landscape and Reveal Complex Transcript Patterns in Hepatocellular Carcinoma
Source: PLoS One. 2011 Oct 17;6(10):e26168. doi: 10.1371/journal.pone.0026168 (PMC3197143; doi:10.1371/journal.pone.0026168)
Supplement: Table S7 — Chromosomal regions enriched by up-regulated genes in HCC tissues. (XLS) [file pone.0026168.s007.xls]

## Sheet: genehigh
Supplementary Table 7. Chromosomal regions enriched by up-regulated genes in HCC tissues
Chromosome	Start region	Start position*	End region	End position*	P value**	FDR	Number of up-regulated genes	Number of total genes	Literature reports	References
1	153470867	chr1q22	154809020	chr1q23.1	5.99e-06	1.97e-05	9	37	Amplified in HCC	Zhang et al. 2009; Wong et al. 2003; Skawran et al. 2008
1	154485639	chr1q22	154809020	chr1q23.1	2.62e-05	8.13e-05	5	10	Amplified in HCC	Zhang et al. 2009; Wong et al. 2003; Skawran et al. 2008
1	233597298	chr1q42.3	240119864	chr1q43	3.44e-05	0.000104435	7	26	Amplified in HCC	Skawran et al. 2008
1	233597298	chr1q42.3	233880677	chr1q42.3	0.000156112	0.000445563	3	3	Amplified in HCC	Skawran et al. 2008
1	239823075	chr1q43	240119864	chr1q43	0.00036096	0.000970529	3	4	Amplified in HCC	Leung et al. 2002
6	26312817	chr6p22.1	28444527	chr6p22.1	0.0002098	0.000588454	9	59	Not reported
8	90839173	chr8q21.3	141714827	chr8q24.3	2.55e-26	4.14e-23	44	156	Amplified in HCC	Yang et al. 2003; Okamoto et al. 2003
8	120812196	chr8q24.12	126448543	chr8q24.13	5.23e-17	5.82e-16	18	30	Amplified in HCC	Okamoto et al. 2003; Yang et al. 2003
8	95453365	chr8q22.1	96115476	chr8q22.1	9.08e-06	2.93e-05	5	8	Amplified in HCC	Okamoto et al. 2003; Yang et al. 2003
8	61753893	chr8q12.2	67505520	chr8q13.1	0.000173598	0.000490301	5	15	Amplified in HCC	Katoh et al. 2005
8	27547304	chr8p21.1	27751435	chr8p21.1	0.00036096	0.000970529	3	4	Amplified in HCC	Katoh et al. 2005
8	17148851	chr8p22	17544896	chr8p22	0.00036096	0.000970529	3	4	Amplified in HCC	Katoh et al. 2005
12	55690053	chr12q13.3	55920794	chr12q13.3	0.000172014	0.000488377	4	8	Not reported
15	38240530	chr15q15.1	39460535	chr15q15.1	3.66e-06	1.23e-05	8	26	Not reported
15	38240530	chr15q15.1	38811646	chr15q15.1	4.06e-06	1.36e-05	6	12	Not reported
15	38240530	chr15q15.1	38473180	chr15q15.1	2.84e-05	8.71e-05	4	5	Not reported
22	40559063	chr22q13.2	40724169	chr22q13.2	0.00036096	0.000970529	3	4	Amplified in HCC	Zhang et al. 2009
X	151750167	chrXq28	152592974	chrXq28	0.000233245	0.000648614	5	16	Not reported
*Position was retrived from UCSC human genome 18(NCBI build 36).
**The significance of enrichment was measured by Fisher’s exact test (P< 0.001).
FDR: false discovery rate
Reference:
1.Zhang SG, Gao YT, Song WQ, Du Z, Yang B, et al. (2009) [Identification of the regions of copy number amplification associated with hepatocellular carcinoma]. Zhonghua Zhong Liu Za Zhi 31: 566-570.
2.Wong N, Chan A, Lee SW, Lam E, To KF, et al. (2003) Positional mapping for amplified DNA sequences on 1q21-q22 in hepatocellular carcinoma indicates candidate genes over-expression. J Hepatol 38: 298-306.
3.Skawran B, Steinemann D, Weigmann A, Flemming P, Becker T, et al. (2008) Gene expression profiling in hepatocellular carcinoma: upregulation of genes in amplified chromosome regions. Mod Pathol 21: 505-516.
4.Leung TH, Wong N, Lai PB, Chan A, To KF, et al. (2002) Identification of four distinct regions of allelic imbalances on chromosome 1 by the combined comparative genomic hybridization and microsatellite analysis on hepatocellular carcinoma. Mod Pathol 15: 1213-1220.
5.Yang J, Qin LX, Ye SL, Liu YK, Li Y, et al. (2003) The abnormalities of chromosome 8 in two hepatocellular carcinoma cell clones with the same genetic background and different metastatic potential. J Cancer Res Clin Oncol 129: 303-308.
6.Okamoto H, Yasui K, Zhao C, Arii S, Inazawa J (2003) PTK2 and EIF3S3 genes may be amplification targets at 8q23-q24 and are associated with large hepatocellular carcinomas. Hepatology 38: 1242-1249.
7.Katoh H, Shibata T, Kokubu A, Ojima H, Loukopoulos P, et al. (2005) Genetic profile of hepatocellular carcinoma revealed by array-based comparative genomic hybridization: identification of genetic indicators to predict patient outcome. J Hepatol 43: 863-874.
