# Supplementary material for: RNA-Seq Analyses Generate Comprehensive Transcriptomic Landscape and Reveal Complex Transcript Patterns in Hepatocellular Carcinoma
Source: PLoS One. 2011 Oct 17;6(10):e26168. doi: 10.1371/journal.pone.0026168 (PMC3197143; doi:10.1371/journal.pone.0026168)
Supplement: Table S8 — Chromosomal regions enriched by down-regulated genes in HCC tissues. (XLS) [file pone.0026168.s008.xls]

## Sheet: genelow
Supplementary Table 8. Chromosomal regions enriched by down-regulated genes in HCC tissues
Chromosome	Start region	Start position*	End region	End position*	P value**	FDR	Number of down-regulated genes	Number of total genes	Literature report	References
4	chr4q12	52612350	chr4q23	100461579	9.47e-09	9.19e-06	23	197	Loss of heterozygosity	Leon and Kew 1996; Li et al. 2000; Chan et al. 2006
12	chr12p13.31	9638415	chr12p13.2	10109832	2.32e-07	1.73e-05	6	9	Not reported
4	chr4q32.1	159655440	chr4q35.1	183958826	7.41e-06	0.000128288	9	47	Allele loss	Li et al. 2000
4	chr4q23	100263855	chr4q23	100461579	1.25e-05	0.000192398	4	5	Loss of heterozygosity	Li et al. 2000; Chan et al. 2006
14	chr14q32.33	105121536	chr14q32.33	105393367	1.51e-05	0.000218467	5	11	Rearrangement	Blanquet et al. 1988
1	chr1q23.1	156067328	chr1q24.3	169448171	3.58e-05	0.000408861	15	157	Not reported
10	chr10q23.33	96512371	chr10q23.33	96819244	8.4e-05	0.000733698	3	3	Loss of heterozygosity	Zhu et al. 2004; Okuno et al. 2009
9	chr9q34.2	135276941	chr9q34.3	137152846	8.79e-05	0.000735315	5	16	Allele loss	Pang et al. 2000
16	chr16q13	55199997	chr16q13	55575257	0.000116463	0.000903756	5	17	Not reported
*Position was retrived from UCSC human genome 18(NCBI build 36).
**The significance of enrichment was measured by Fisher’s exact test (P< 0.001).
FDR: false discovery rate
Reference:
1.Leon M, Kew MC (1996) Loss of heterozygosity in chromosome 4q12-q13 in hepatocellular carcinoma in southern African blacks. Anticancer Res 16: 349-351.
2.Li S, Wang H, Zhang C (2000) [Genome-wide loss of heterozygosity analyses in primary hepatocellular carcinoma]. Zhonghua Yi Xue Za Zhi 80: 577-581.
3.Chan KY, Lai PB, Squire JA, Beheshti B, Wong NL, et al. (2006) Positional expression profiling indicates candidate genes in deletion hotspots of hepatocellular carcinoma. Mod Pathol 19: 1546-1554.
4.Blanquet V, Garreau F, Chenivesse X, Brechot C, Turleau C (1988) Regional mapping to 4q32.1 by in situ hybridization of a DNA domain rearranged in human liver cancer. Hum Genet 80: 274-276.
5.Okuno T, Ueda M, Tsuruyama T, Haga H, Takada Y, et al. (2009) Loss of heterozygosity on 10q23 is involved in metastatic recurrence of hepatocellular carcinoma. Cancer Sci 100: 520-528.
6.Zhu GN, Zuo L, Zhou Q, Zhang SM, Zhu HQ, et al. (2004) Loss of heterozygosity on chromosome 10q22-10q23 and 22q11.2-22q12.1 and p53 gene in primary hepatocellular carcinoma. World J Gastroenterol 10: 1975-1978.
7.Pang E, Wong N, Lai PB, To KF, Lau JW, et al. (2000) A comprehensive karyotypic analysis on a newly developed hepatocellular carcinoma cell line, HKCI-1, by spectral karyotyping and comparative genomic hybridization. Cancer Genet Cytogenet 121: 9-16.
