# Supplementary material for: RNA-Seq Analyses Generate Comprehensive Transcriptomic Landscape and Reveal Complex Transcript Patterns in Hepatocellular Carcinoma
Source: PLoS One. 2011 Oct 17;6(10):e26168. doi: 10.1371/journal.pone.0026168 (PMC3197143; doi:10.1371/journal.pone.0026168)
Supplement: Table S12 — Significant differently expressed novel exon-exon junction. (XLS) [file pone.0026168.s012.xls]

## Sheet: sigjunction1
Supplementary Table 12. Significant differently expressed novel exon-exon junctions
Novel exon-exon junction ID	Log2-transformed FC	P value 1	P value 2	P value 3	Ensembl gene ID	Gene symbol
ENSE00001778964-ENSE00001794109	-4.89953	0.0152023	0.0273438	0.000267	ENSG00000233855	IGHV3-6
ENSE00001633610-ENSE00001794109	-4.89953	0.0152023	0.0273438	0.000267	ENSG00000233855	IGHV3-6
ENSE00001622063-ENSE00001681258	-3.14275	0.0092151	0.00976562	0.000274	ENSG00000198670	LPA
ENSE00001726025-ENSE00001681258	-3.14275	0.0092151	0.00976562	0.000274	ENSG00000198670	LPA
ENSE00001766062-ENSE00001681258	-3.14275	0.0092151	0.00976562	0.000274	ENSG00000198670	LPA
ENSE00001722031-ENSE00001681258	-3.14275	0.0092151	0.00976562	0.000274	ENSG00000198670	LPA
ENSE00001747958-ENSE00001681258	-3.14275	0.0092151	0.00976562	0.000274	ENSG00000198670	LPA
ENSE00001625665-ENSE00001681258	-3.14275	0.0092151	0.00976562	0.000274	ENSG00000198670	LPA
ENSE00001715159-ENSE00001508198	-5.37402	0.0219087	0.0371094	0.000274	ENSG00000211893	AL928742.3-2
ENSE00000897845-ENSE00001618214	-2.57328	0.0308972	0.00976562	0.000579	ENSG00000175899	A2M
ENSE00001146105-ENSE00000965897	4.28263	0.0425433	0.0390625	0.000741	ENSG00000115414	FN1
ENSE00001341130-ENSE00001726466	5.35195	0.00171889	0.00976562	0.000787	ENSG00000076770	MBNL3
ENSE00001703955-ENSE00001772191	-6.10616	0.00541647	0.0195312	0.00096	ENSG00000233855	IGHV3-6
ENSE00001682985-ENSE00001603587	-6.10616	0.00541647	0.0195312	0.00096	ENSG00000211897	IGHM
ENSE00001703955-ENSE00001787966	-5.42267	0.0108227	0.0195312	0.00123	ENSG00000233855	IGHV3-6
ENSE00001077324-ENSE00001077327	-6.68203	5.3072e-05	0.00195312	0.00158	ENSG00000163687	DNASE1L3
ENSE00001675210-ENSE00001612662	-4.08747	0.012859	0.015625	0.00167	ENSG00000231486	IGKV2-4
ENSE00001551826-ENSE00001688851	-4.08747	0.012859	0.015625	0.00167	ENSG00000231486	IGKV2-4
ENSE00001766784-ENSE00001772191	-4.95043	0.0110037	0.0117188	0.0018	ENSG00000233855	IGHV3-6
ENSE00001326543-ENSE00001304898	-5.75595	0.00163189	0.015625	0.00186	ENSG00000184374	COLEC10
ENSE00001057389-ENSE00001600613	-3.78632	0.00611791	0.00390625	0.00227	ENSG00000223609	HBB
ENSE00001720326-ENSE00001706046	6.60927	9.40907e-05	0.00390625	0.00271	ENSG00000087586	AURKA
ENSE00001720326-ENSE00001794084	6.60927	9.40907e-05	0.00390625	0.00271	ENSG00000087586	AURKA
ENSE00001742536-ENSE00001685814	-5.72796	0.00640947	0.00976562	0.00281	ENSG00000130649	CYP2E1
ENSE00001700465-ENSE00001794109	-4.40773	0.0175753	0.0273438	0.00282	ENSG00000233855	IGHV3-6
ENSE00001661670-ENSE00001582352	-3.52382	0.00807693	0.00195312	0.00384	ENSG00000115963	RND3
ENSE00001742667-ENSE00001070099	-3.52382	0.00807693	0.00195312	0.00384	ENSG00000115963	RND3
ENSE00001076802-ENSE00001762606	-5.2096	0.00254914	0.015625	0.00476	ENSG00000163631	ALB
ENSE00001742378-ENSE00001750189	-4.78145	0.00115053	0.00195312	0.00636	ENSG00000099998	GGTLA1
ENSE00001603956-ENSE00001699248	-4.8751	0.00837545	0.00976562	0.00636	ENSG00000231486	IGKV2-4
ENSE00001603956-ENSE00001599495	-4.8751	0.00837545	0.00976562	0.00636	ENSG00000231486	IGKV2-4
ENSE00001704561-ENSE00001630592	-4.8751	0.00837545	0.00976562	0.00636	ENSG00000231486	IGKV2-4
ENSE00001704561-ENSE00001599495	-4.8751	0.00837545	0.00976562	0.00636	ENSG00000231486	IGKV2-4
ENSE00001683101-ENSE00001599495	-4.8751	0.00837545	0.00976562	0.00636	ENSG00000231486	IGKV2-4
ENSE00001683101-ENSE00001699248	-4.8751	0.00837545	0.00976562	0.00636	ENSG00000231486	IGKV2-4
ENSE00001675210-ENSE00001705120	-4.05512	0.0134707	0.03125	0.00636	ENSG00000231486	IGKV2-4
ENSE00001675210-ENSE00001709748	-4.05512	0.0134707	0.03125	0.00636	ENSG00000231486	IGKV2-4
ENSE00001551826-ENSE00001709748	-4.05512	0.0134707	0.03125	0.00636	ENSG00000231486	IGKV2-4
ENSE00001551826-ENSE00001705120	-4.05512	0.0134707	0.03125	0.00636	ENSG00000231486	IGKV2-4
ENSE00001717939-ENSE00001029497	2.08093	0.0495438	0.0488281	0.00647	ENSG00000113889	KNG1
ENSE00001252220-ENSE00001029497	2.08093	0.0495438	0.0488281	0.00647	ENSG00000113889	KNG1
ENSE00001485613-ENSE00001655668	3.9785	0.00880745	0.00195312	0.00774	ENSG00000196139	AKR1C3
ENSE00001174566-ENSE00001174545	4.62525	0.020425	0.0234375	0.00798	ENSG00000156802	ATAD2
ENSE00001791417-ENSE00001785278	-4.92711	0.0170782	0.0195312	0.00911	ENSG00000184999	SLC22A10
ENSE00001748918-ENSE00001728032	-1.96183	0.00355522	0.00585938	0.00944	ENSG00000213759	UGT2B11
ENSE00001632723-ENSE00001607480	-1.96183	0.00355522	0.00585938	0.00944	ENSG00000213759	UGT2B11
ENSE00001616408-ENSE00001597802	-1.88951	0.00587109	0.00976562	0.0123	ENSG00000135226	UGT2B28
ENSE00001692536-ENSE00001748918	-1.87929	0.00602052	0.00976562	0.0128	ENSG00000213759	UGT2B11
ENSE00001347001-ENSE00001764697	4.55831	0.00485255	0.00195312	0.0128	ENSG00000115129	TP53I3
ENSE00001669437-ENSE00001764697	4.55831	0.00485255	0.00195312	0.0128	ENSG00000115129	TP53I3
ENSE00001549874-ENSE00001764697	4.55831	0.00485255	0.00195312	0.0128	ENSG00000115129	TP53I3
ENSE00001374637-ENSE00001764697	4.55831	0.00485255	0.00195312	0.0128	ENSG00000115129	TP53I3
ENSE00001681441-ENSE00000721478	4.55831	0.00485255	0.00195312	0.0128	ENSG00000115129	TP53I3
ENSE00000721784-ENSE00000721832	-4.64923	0.0091886	0.00976562	0.0134	ENSG00000079557	AFM
ENSE00001054176-ENSE00001313673	4.98153	0.0135689	0.0195312	0.0156	ENSG00000160752	FDPS
ENSE00000967027-ENSE00000860994	3.00386	0.047496	0.03125	0.0197	ENSG00000162267	ITIH3
ENSE00001737758-ENSE00001604866	-1.6668	0.0156537	0.0195312	0.0236	ENSG00000213759	UGT2B11
ENSE00000774701-ENSE00000963702	-4.90189	0.00533324	0.015625	0.0307	ENSG00000019169	MARCO
ENSE00001631508-ENSE00001321115	5.42301	0.00241612	0.00195312	0.0364	ENSG00000182718	ANXA2
ENSE00001608158-ENSE00001321115	5.42301	0.00241612	0.00195312	0.0364	ENSG00000182718	ANXA2
ENSE00001766828-ENSE00001802919	4.21263	0.0354622	0.0273438	0.0434	ENSG00000160211	G6PD
FC: fold change; NA: no annotation
P value 1 was derived from Student t test; P value 2 from Wilcoxon signed-rank test; P value 3 stands for false discovery rate(FDR)
